# Supplementary material
Source: publisher site journal article supplement (https://en-cdn.bio-protocol.org/attached/file/20180711/2941%20Supplementary%20file%20Appendix.docx)

**Appendix**

**
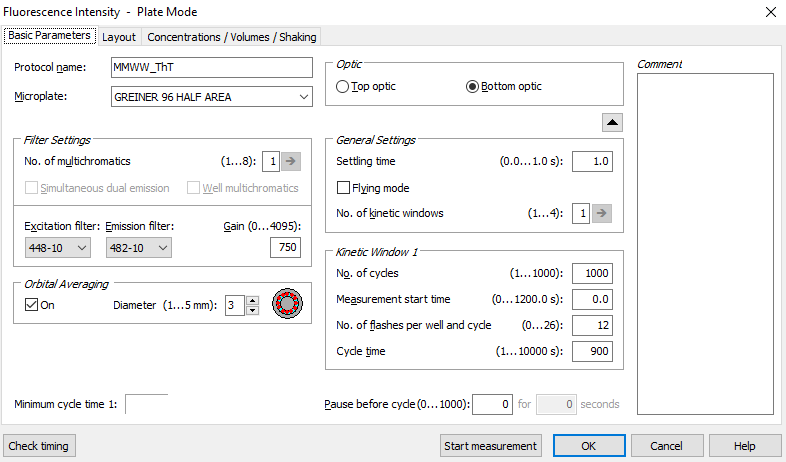
**

**
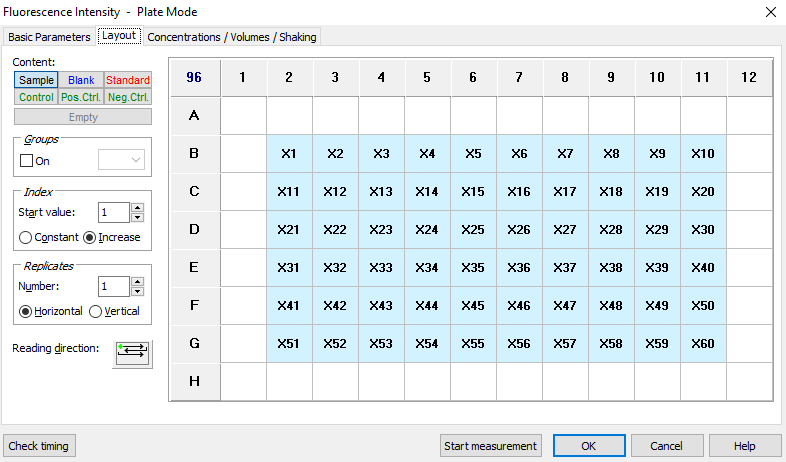
**

**
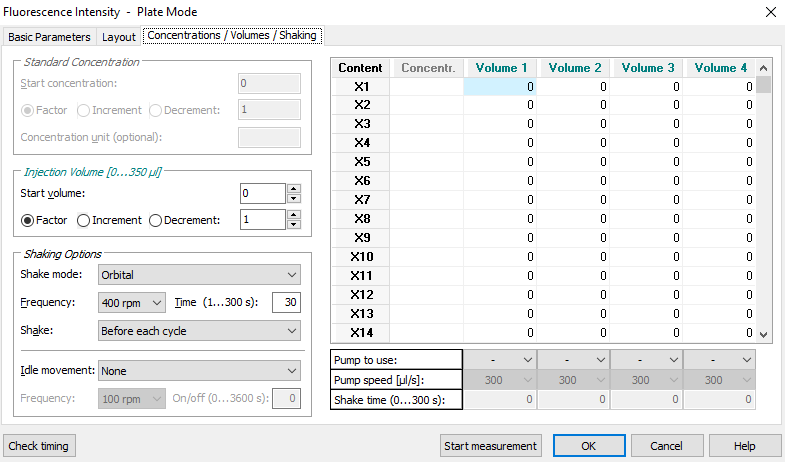
**

Supplement: Supplementary file 1 [file 2941%20Supplementary%20file%20Appendix.docx]
